# Supplementary material
Source: Springer Nature journal article supplement (https://www.springermedizin.de/resource/supplementary/13075_2004_1352_MOESM6_ESM.pdf/9689582)
Supplement: MOESM6 [file 9689582]

**Figure 6**

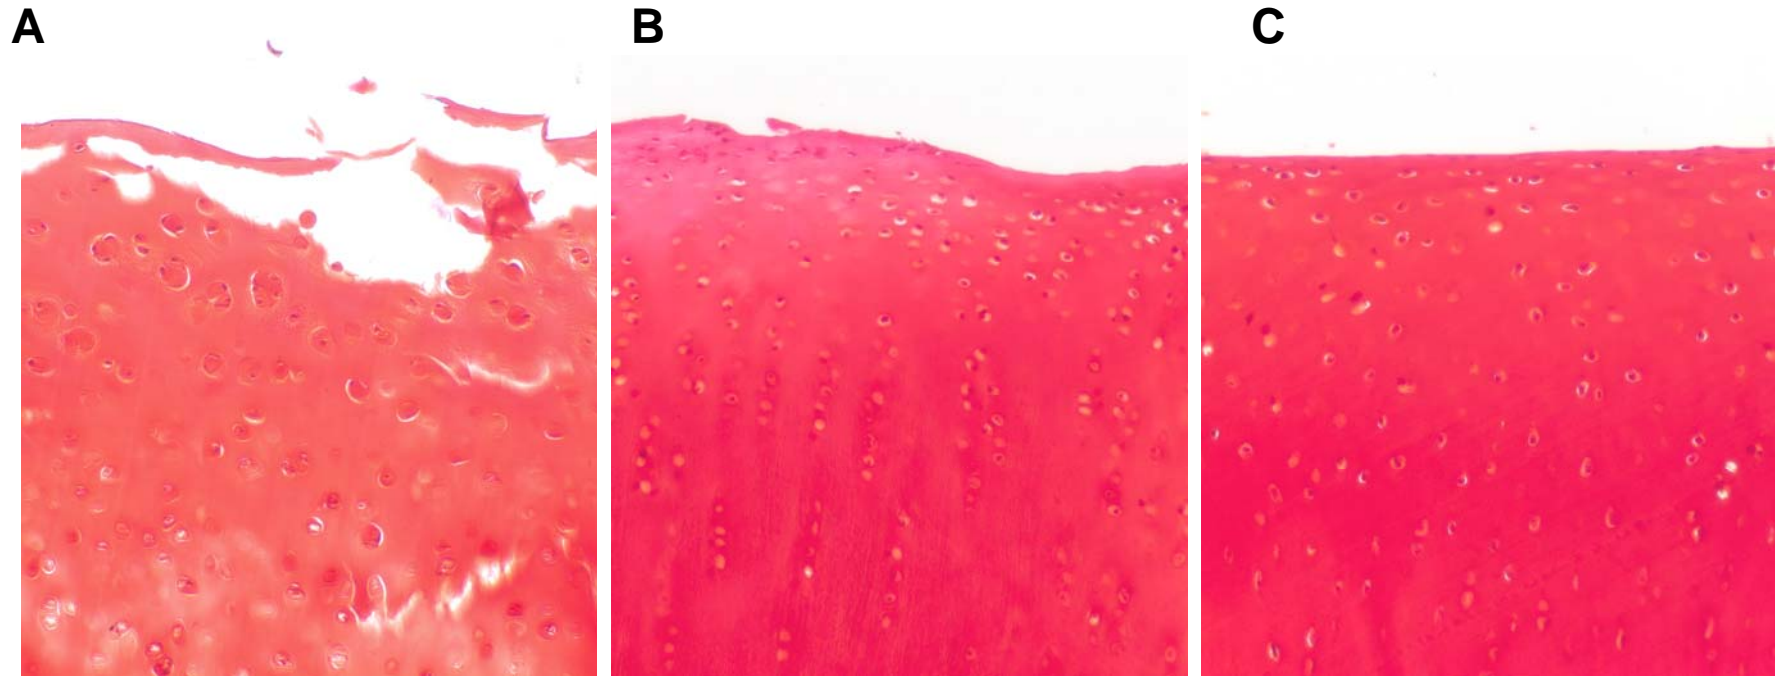

**mod. MS**     $14,0 \pm 0,8$

$3,9 \pm 1,9$

$1,1 \pm 0,6$

**Col II:**     $1402 \pm 1259^{a,b}$

$2092 \pm 1876^{a,c}$

$208 \pm 185$

**Col I:**     $7,7 \pm 6,0^{a,b}$

$17,1 \pm 30,4^{a,c}$

$1,2 \pm 0,9$

**YKL40:**     $2,1 \pm 1,4^{a,b}$

$2,3 \pm 2,0^{c,d}$

$0,5 \pm 0,8$

**Aggrecan:**  $298 \pm 377^e$

$697 \pm 656^f$

$661 \pm 518$

**MMP13:**     $1,1 \pm 0,9^{a,b}$

$1,5 \pm 1,7^{a,c}$

$0,3 \pm 0,4$

**TenascinC:**  $6,1 \pm 3,5^e$

$17,7 \pm 29,0^f$

$6,2 \pm 4,3$
